# Supplementary material for: Diversity of Stability, Localization, Interaction and Control of Downstream Gene Activity in the Maize Aux/IAA Protein Family
Source: PubMed Central journal article supplement (PMC4159291; doi:10.1371/journal.pone.0107346), 2014-09-09

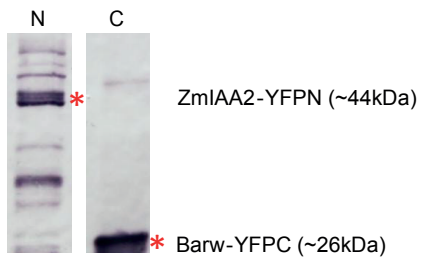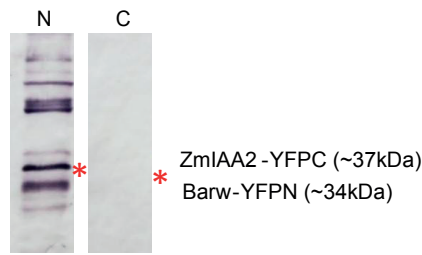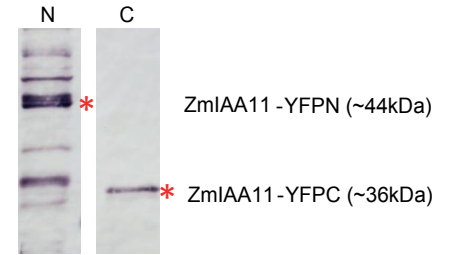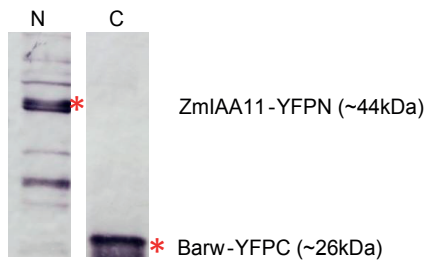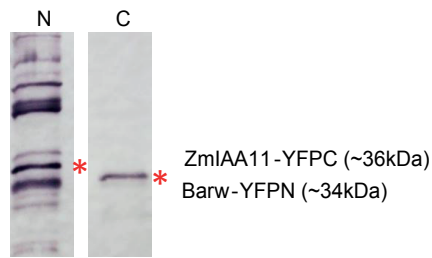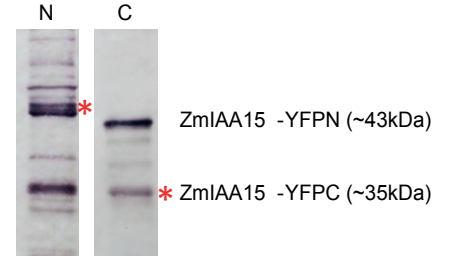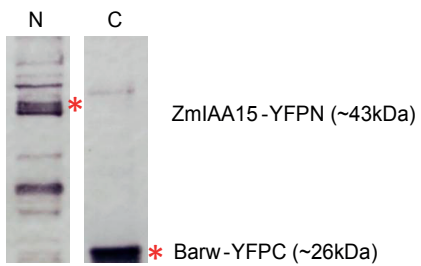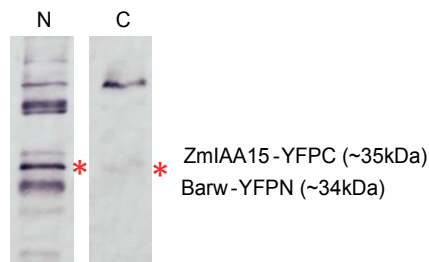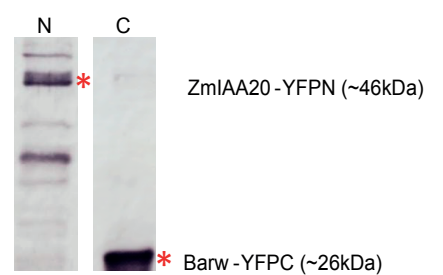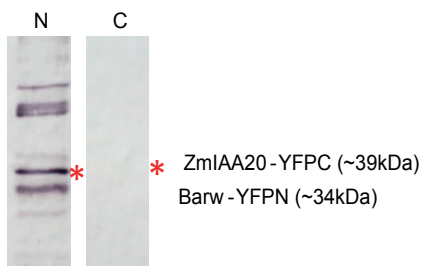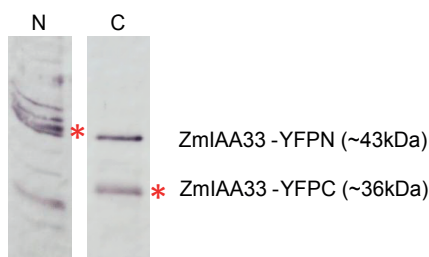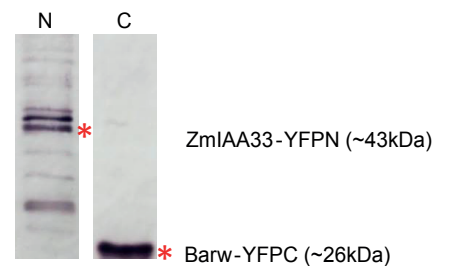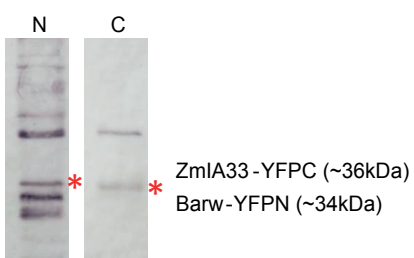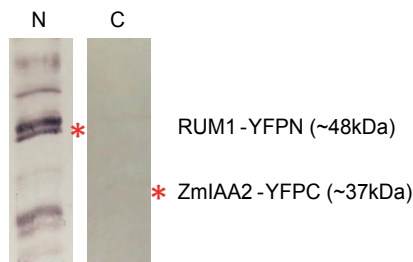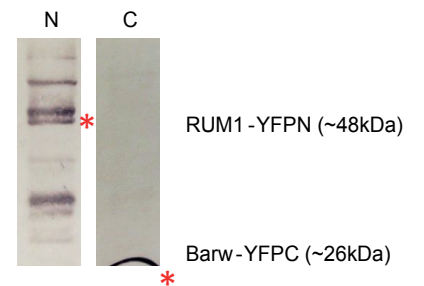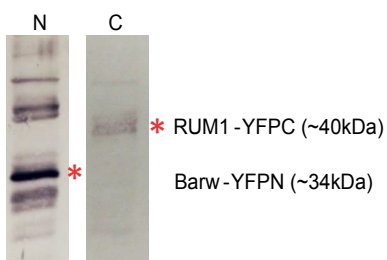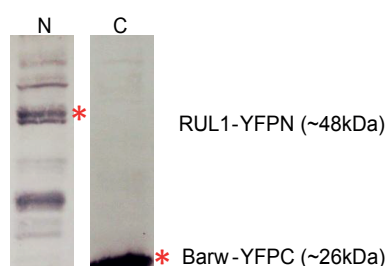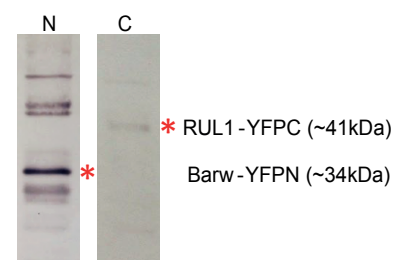

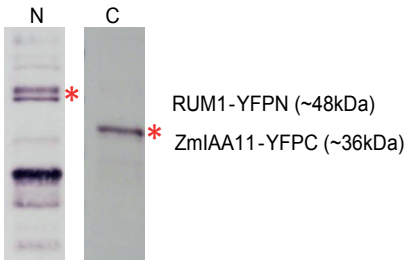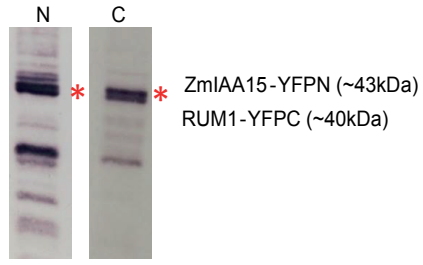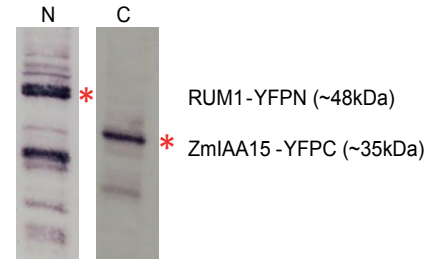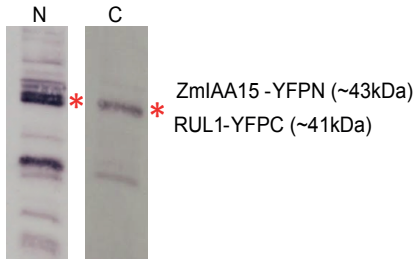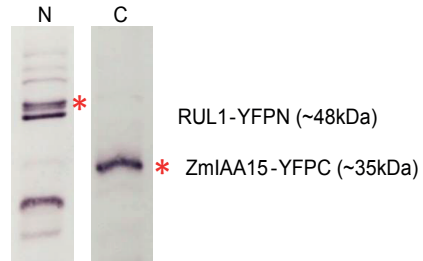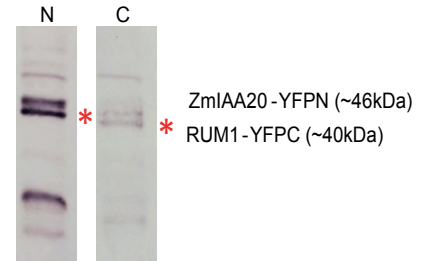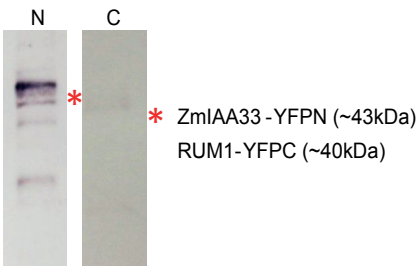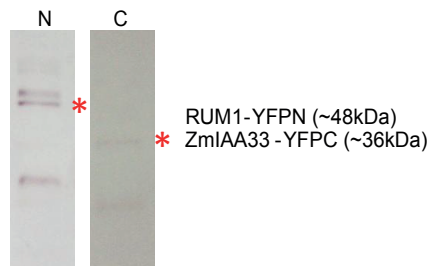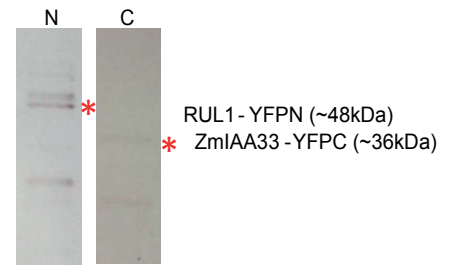

Supplement: pone.0107346.s005.pdf [file pone.0107346.s005.pdf]
